# Supplementary material for: A correlation-based predictor for pair-association in ionic liquids
Source: Royal Society of Chemistry journal article supplement (doi:10.1039/c1cp21018a), 2011-01-01
Supplement: c1cp21018a.pdf [file c1cp21018a.pdf]

## Supplemental Material

Paper: A correlation-based predictor for Pair-Association in Ionic Liquids

Authors: A. Maiti and R. D. Rogers

Atomic coordinates for the structures in Figs. 1(a-d)  
(Cartesian coordinates in *Angstroms*)

### Structure for Fig. 1(a)

C<sub>4</sub>mim<sup>+</sup>Br<sup>-</sup> (gas phase)

|    |              |              |              |
|----|--------------|--------------|--------------|
| C  | 2.304503279  | 1.321892380  | 0.225295108  |
| N  | 2.585872021  | 0.007244650  | -0.119046582 |
| C  | 1.012909777  | 1.571510110  | -0.129184443 |
| N  | 0.506512962  | 0.402700885  | -0.685487266 |
| C  | 1.445260964  | -0.567997995 | -0.576245144 |
| C  | -0.895398546 | 0.151739997  | -1.039766250 |
| C  | -1.822491443 | 0.194557529  | 0.175129278  |
| C  | -3.260978071 | -0.173878716 | -0.197700031 |
| C  | -4.206694146 | -0.113164100 | 1.003000262  |
| C  | 3.735468104  | -0.772977525 | 0.321479793  |
| H  | 3.048580670  | 1.962506759  | 0.681625565  |
| H  | 0.420335135  | 2.473440372  | -0.044831292 |
| H  | 1.383065688  | -1.543843302 | -1.032509509 |
| H  | -0.924229069 | -0.844297913 | -1.500086060 |
| H  | -1.193381255 | 0.885587823  | -1.804302703 |
| H  | -1.805207878 | 1.204946271  | 0.618452465  |
| H  | -1.421520167 | -0.504676093 | 0.927971593  |
| H  | -3.272595748 | -1.190535987 | -0.625534401 |
| H  | -3.625384215 | 0.501051232  | -0.992682056 |
| H  | -5.234402782 | -0.380721726 | 0.718136278  |
| H  | -4.229085966 | 0.897256507  | 1.439715318  |
| H  | -3.880485513 | -0.808558147 | 1.790120553  |
| H  | 4.491784248  | -0.091307095 | 0.723970979  |
| H  | 4.162332425  | -1.326772180 | -0.523995303 |
| H  | 3.378788257  | -1.477203465 | 1.092891394  |
| Br | 0.737096451  | -2.257596170 | 1.481274318  |

Structure for Fig. 1(b)  
C<sub>4</sub>mim<sup>+</sup>Br<sup>-</sup> (water)

|    |              |              |              |
|----|--------------|--------------|--------------|
| C  | 2.410816285  | 1.242156120  | 0.311001118  |
| N  | 2.547812491  | -0.119236134 | 0.103578880  |
| C  | 1.138060849  | 1.575971153  | -0.063619890 |
| N  | 0.526201642  | 0.413993418  | -0.496443027 |
| C  | 1.394514873  | -0.604744472 | -0.383781891 |
| C  | -0.870494534 | 0.275330279  | -0.946914235 |
| C  | -1.826849284 | 0.007194844  | 0.213702798  |
| C  | -3.268229112 | -0.161275675 | -0.275625028 |
| C  | -4.247530638 | -0.435666857 | 0.867323484  |
| C  | 3.753758296  | -0.906939385 | 0.366532606  |
| H  | 3.223201525  | 1.848300566  | 0.693036504  |
| H  | 0.629616925  | 2.532465628  | -0.068046073 |
| H  | 1.166944584  | -1.642769448 | -0.651922227 |
| H  | -0.889075555 | -0.558676365 | -1.660563497 |
| H  | -1.128789843 | 1.199995813  | -1.478704669 |
| H  | -1.770273063 | 0.833595341  | 0.941050319  |
| H  | -1.504464632 | -0.911707920 | 0.730765286  |
| H  | -3.302407142 | -0.990130527 | -1.002413330 |
| H  | -3.576805850 | 0.746857249  | -0.820732583 |
| H  | -5.274824856 | -0.550366812 | 0.490557125  |
| H  | -4.246783317 | 0.389460848  | 1.596319562  |
| H  | -3.979423062 | -1.358149649 | 1.405503339  |
| H  | 4.575908023  | -0.534700704 | -0.255258151 |
| H  | 3.548689217  | -1.951971577 | 0.119333186  |
| H  | 4.017549310  | -0.821492609 | 1.426336736  |
| Br | -0.238470825 | -3.604196297 | -1.393538079 |

Structure for Fig. 1(c)  
C<sub>4</sub>mim<sup>+</sup>BF<sub>4</sub><sup>-</sup> (water)

|   |              |              |              |
|---|--------------|--------------|--------------|
| C | 2.274633421  | 1.692526215  | -0.188007352 |
| N | 2.546706338  | 0.358190205  | 0.053388181  |
| C | 0.975352574  | 1.764419674  | -0.608215777 |
| N | 0.480780982  | 0.472561656  | -0.620599978 |
| C | 1.447067490  | -0.364986446 | -0.211563075 |
| C | -0.904131610 | 0.090444388  | -0.950431231 |
| C | -1.850566223 | 0.291962793  | 0.231638927  |
| C | -3.291337559 | -0.085059850 | -0.126706451 |
| C | -4.249806631 | 0.109161228  | 1.050269523  |
| C | 3.815816726  | -0.180575233 | 0.549314280  |
| H | 3.023784484  | 2.463779937  | -0.052825226 |
| H | 0.371446097  | 2.612100656  | -0.908140202 |
| H | 1.362571659  | -1.442707964 | -0.101026567 |
| H | -0.882486357 | -0.958928460 | -1.268706771 |
| H | -1.205182358 | 0.698991713  | -1.813046869 |
| H | -1.814140371 | 1.345578440  | 0.553489685  |
| H | -1.501778255 | -0.323860805 | 1.076211065  |
| H | -3.318512950 | -1.135934135 | -0.459850300 |
| H | -3.626369482 | 0.524206728  | -0.983157831 |
| H | -5.277361539 | -0.169945685 | 0.775367350  |
| H | -4.261586500 | 1.160058656  | 1.379093495  |
| H | -3.950023897 | -0.509209903 | 1.910732326  |
| H | 4.637266941  | 0.283103309  | -0.005952457 |
| H | 3.824803087  | -1.262094275 | 0.389504630  |
| H | 3.914183715  | 0.038484922  | 1.618816285  |
| B | 0.860725877  | -3.114763582 | 2.061763229  |
| F | -0.454955768 | -2.670426883 | 1.760089098  |
| F | 1.563865568  | -3.353108779 | 0.836136686  |
| F | 1.545723386  | -2.118337687 | 2.805631437  |
| F | 0.801250850  | -4.319607463 | 2.809167909  |

Structure for Fig. 1(d)  
C<sub>4</sub>mim<sup>+</sup>PF<sub>6</sub><sup>-</sup> (water)

|   |              |              |              |
|---|--------------|--------------|--------------|
| C | 2.082053933  | 2.113318068  | -1.329236756 |
| N | 2.551036481  | 1.134944551  | -0.470612447 |
| C | 0.787316362  | 1.794178728  | -1.629086523 |
| N | 0.490582557  | 0.623293965  | -0.954638601 |
| C | 1.571943559  | 0.242919941  | -0.256467353 |
| C | -0.819725284 | -0.050514938 | -0.931779389 |
| C | -1.811540501 | 0.648331923  | -0.002631882 |
| C | -3.171284903 | -0.056696178 | -0.002471732 |
| C | -4.177792392 | 0.613531407  | 0.933795627  |
| C | 3.906597744  | 1.052262626  | 0.078425342  |
| H | 2.705496148  | 2.939479379  | -1.648736997 |
| H | 0.060106330  | 2.292626084  | -2.258369791 |
| H | 1.639774939  | -0.632790710 | 0.377716614  |
| H | -0.641803877 | -1.084491333 | -0.612757333 |
| H | -1.185325037 | -0.072184213 | -1.966380018 |
| H | -1.936974482 | 1.696178860  | -0.321413365 |
| H | -1.393516235 | 0.661052673  | 1.016301852  |
| H | -3.032886716 | -1.110482188 | 0.293163177  |
| H | -3.573251193 | -0.071075863 | -1.029095201 |
| H | -5.152187720 | 0.103763075  | 0.899884871  |
| H | -4.339944586 | 1.666862439  | 0.655227353  |
| H | -3.825654761 | 0.594515303  | 1.976774446  |
| H | 4.598459542  | 0.717977073  | -0.703163683 |
| H | 3.906024237  | 0.336574850  | 0.905492054  |
| H | 4.202846752  | 2.040039250  | 0.445154700  |
| P | 0.846166124  | -0.995507717 | 3.521557576  |
| F | 1.612472173  | -0.347686864 | 4.827941183  |
| F | -0.613359642 | -0.701191981 | 4.223965014  |
| F | 0.890727704  | -2.481971845 | 4.228985054  |
| F | 2.309299918  | -1.292524159 | 2.811227631  |
| F | 0.087696925  | -1.645467133 | 2.206250053  |
| F | 0.806571656  | 0.489608904  | 2.808196242  |
